# Supplementary material for: The telomere lengthening conundrum – it could be biology
Source: PubMed Central journal article supplement (PMC5334537; doi:10.1111/acel.12555), 2016-12-12
Supplement: ACEL-16-312-s001.pdf [file ACEL-16-312-s001.pdf]

## Appendix S1 for 'The telomere lengthening conundrum – it could be biology'

As part of our model, it is necessary to simulate annual telomere attrition values for each year that are correlated with the previous year's values with correlation coefficient  $r$ , whilst maintaining the required mean annual telomere attrition  $\mu_a$  and required standard deviation of annual attrition  $\sigma_a$ . Here, we prove that appropriate values can be generated using the formula:

$$attrition_y = r \cdot attrition_{y-1} + \sqrt{(1-r^2)} X \quad (1)$$

In this expression,  $attrition_y$  is the attrition values for the current year;  $attrition_{y-1}$  is the attrition values for the previous year, and  $X$  is an independently generated random variable with distribution  $X \sim N(\frac{(1-r)}{\sqrt{(1-r^2)}}\mu_a, \sigma_a)$ . To prove that (1) is the appropriate formula, we must show that it has expected value  $\mu_a$ , standard deviation  $\sigma_a$ , and that the correlation between  $attrition_{y-1}$  and  $attrition_y$  is  $r$ .

First, the expected value of  $attrition_y$ . By linearity of expectation:

$$\begin{aligned} E(attrition_y) &= E(r \cdot attrition_{y-1} + \sqrt{(1-r^2)} X) \\ &= r \cdot E(attrition_{y-1}) + \sqrt{(1-r^2)} E(X) \\ &= r\mu_a + \sqrt{(1-r^2)} \frac{(1-r)}{\sqrt{(1-r^2)}}\mu_a \\ &= r\mu_a + (1-r)\mu_a \\ &= \mu_a \end{aligned}$$

as required.

Next, we derive the variance of  $attrition_y$ . Because of the independence of  $attrition_{y-1}$  and  $X$ ,

$$\begin{aligned} V(attrition_y) &= V(r \cdot attrition_{y-1} + \sqrt{(1-r^2)} X) \\ &= r^2 V(attrition_{y-1}) + (1-r^2) V(X) \\ &= r^2 \sigma_a^2 + (1-r^2) \sigma_a^2 \\ &= \sigma_a^2 \end{aligned}$$

Hence, the standard deviation of  $attrition_y$  is  $\sigma_a$ .

Finally, the correlation between  $attrition_y$  and  $attrition_{y-1}$  is derived as follows. From the definition of correlation:

$$\begin{aligned}\text{Cor}(attrition_y, attrition_{y-1}) &= \frac{\text{Cov}(attrition_y, attrition_{y-1})}{\sqrt{V(attrition_y)V(attrition_{y-1})}} \\ &= \frac{\text{Cov}(attrition_y, attrition_{y-1})}{\sigma_a^2}\end{aligned}$$

Since  $X$  is independent of  $attrition_{y-1}$ ,  $\text{Cov}(attrition_{y-1}, X) = 0$ . Moreover,  $\text{Cov}(attrition_{y-1}, r \cdot attrition_{y-1}) = r \cdot V(attrition_{y-1}) = r\sigma_a^2$ . Hence:

$$\begin{aligned}\text{Cov}(attrition_y, attrition_{y-1}) &= \text{Cov}(attrition_{y-1}, r \cdot attrition_{y-1} + \sqrt{(1-r^2)} X) \\ &= r \cdot V(attrition_{y-1}) \\ &= r\sigma_a^2\end{aligned}$$

Thus, as required:

$$\begin{aligned}\text{Cor}(attrition_y, attrition_{y-1}) &= \frac{r\sigma_a^2}{\sigma_a^2} \\ &= r\end{aligned}$$
