# Supplementary material for: The telomere lengthening conundrum – it could be biology
Source: PubMed Central journal article supplement (PMC5334537; doi:10.1111/acel.12555), 2016-12-12

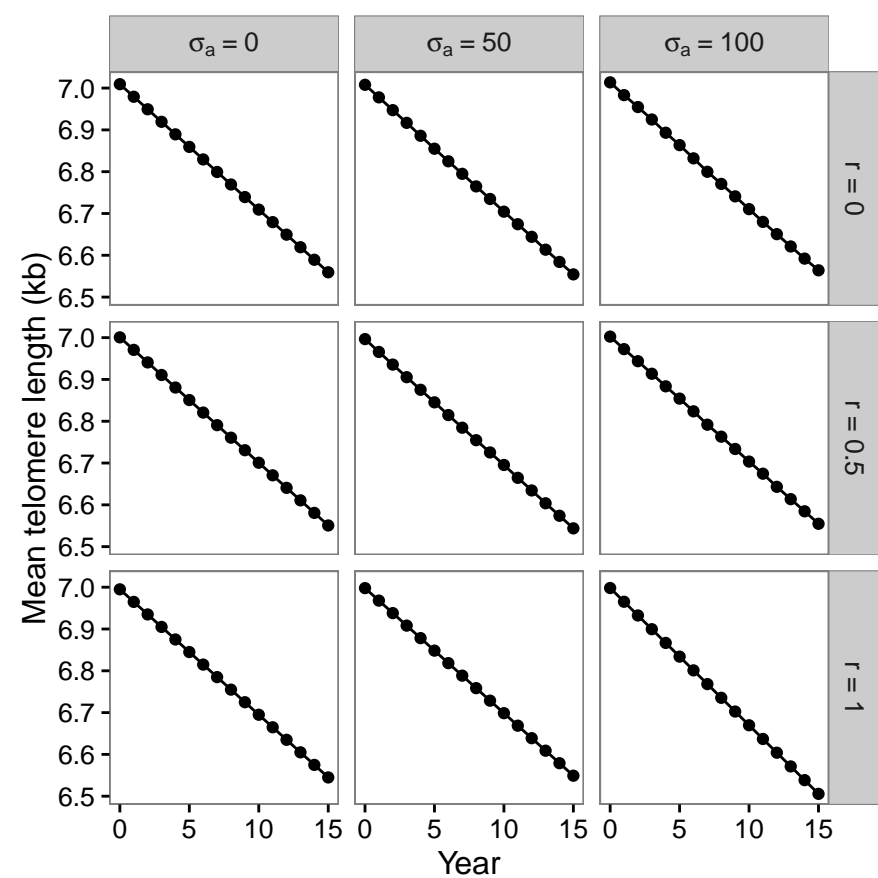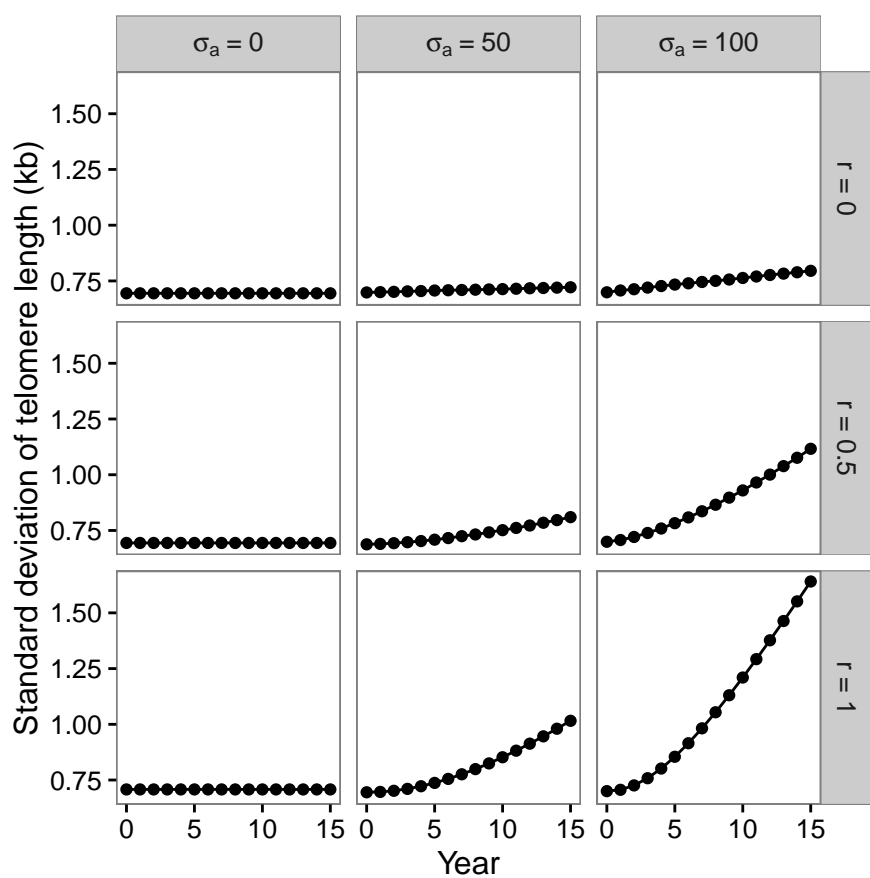

Supplement: ACEL-16-312-s002.pdf [file ACEL-16-312-s002.pdf]
